# Supplementary material for: Antioxidant Properties of Pulp, Peel and Seeds of Phlegrean Mandarin (Citrus reticulata Blanco) at Different Stages of Fruit Ripening
Source: MDPI journal article supplement (doi:10.3390/antiox11020187), 2022-01-19
Supplement: s1 [file s1]

**Supplementary Table S1.** Mass Spectra parameters: list of precursor ion, product ions, declustering potential (DP) and collision energy (CE).

| Compound                          | Precursor ion | Product ion | DP  | CE |
|-----------------------------------|---------------|-------------|-----|----|
| Delphinidin diglucoside           | 627           | 303         | 90  | 46 |
| Delphinidin diglucoside           | 627           | 256         | 90  | 46 |
| Cyanidin-3,5-di-O-glucoside       | 611           | 287         | 177 | 55 |
| Delphinidin-3-O-glucoside         | 465           | 303         | 181 | 30 |
| Delphinidin-3-O-glucoside         | 465           | 285         | 181 | 30 |
| Cyanidin-3-O-glucoside            | 449           | 287         | 192 | 27 |
| Cyanidin-3-O-glucoside            | 449           | 241         | 192 | 27 |
| Delphinidin-3-O-arabinoside       | 435           | 303         | 192 | 25 |
| Delphinidin-3-O-arabinoside       | 435           | 285         | 192 | 25 |
| Petunidin-3-O-glucoside           | 479           | 317         | 172 | 27 |
| Petunidin-3-O-glucoside           | 479           | 274         | 172 | 27 |
| Cyanidin-3-O-arabinoside          | 419           | 287         | 194 | 24 |
| Cyanidin-3-O-arabinoside          | 419           | 241         | 194 | 24 |
| Pelargonidin-3-O-glucoside        | 433           | 271         | 163 | 28 |
| Petunidin-3-O-arabinoside         | 449           | 317         | 124 | 25 |
| Petunidin-3-O-arabinoside         | 449           | 274         | 124 | 25 |
| Peonidin-3-O-glucoside            | 463           | 301         | 104 | 29 |
| Peonidin-3-O-glucoside            | 463           | 268         | 104 | 29 |
| Malvidin-3-O-glucoside            | 493           | 331         | 94  | 29 |
| Malvidin-3-O-glucoside            | 493           | 270         | 94  | 29 |
| Malvidin-3-O-arabinoside          | 463           | 331         | 94  | 24 |
| Malvidin-3-O-arabinoside          | 463           | 270         | 94  | 24 |
| Delphinidin rutinoside            | 611           | 303         | 165 | 45 |
| Delphinidin rutinoside            | 611           | 284         | 165 | 45 |
| Malvidin 3-O-p-coumaroylglucoside | 639           | 331         | 121 | 29 |
| Malvidin 3-O-p-coumaroylglucoside | 639           | 315         | 121 | 29 |
| Naringin                          | 581           | 273         | 105 | 50 |
| Naringin                          | 581           | 153         | 105 | 50 |
| Flavone+Na                        | 245           | 227         | 98  | 32 |
| Flavone+Na                        | 245           | 209         | 98  | 32 |
| Apigenin                          | 271           | 153         | 171 | 49 |
| Apigenin                          | 271           | 271         | 171 | 49 |
| Quercetin-3-glucoside             | 465           | 303         | 104 | 29 |
| Quercetin-3-glucoside             | 465           | 245         | 104 | 29 |
| Procyanidin B1                    | 579           | 291         | 105 | 50 |
| Procyanidin B1                    | 579           | 409         | 105 | 50 |
| Catechin                          | 291           | 139         | 16  | 21 |
| Catechin                          | 291           | 123         | 16  | 21 |
| Epicatechin                       | 291           | 138         | 36  | 21 |

|                          |     |     |     |    |
|--------------------------|-----|-----|-----|----|
| Epicatechin              | 291 | 123 | 36  | 21 |
| Caffeine                 | 195 | 138 | 71  | 26 |
| Caffeine                 | 195 | 110 | 71  | 26 |
| Catechin-3-gallate       | 443 | 291 | 124 | 25 |
| Catechin-3-gallate       | 443 | 273 | 124 | 25 |
| EC-3-gallate             | 443 | 291 | 124 | 25 |
| EC-3-gallate             | 443 | 273 | 124 | 25 |
| EGC 3-gallate            | 459 | 307 | 104 | 29 |
| EGC 3-gallate            | 459 | 289 | 104 | 29 |
| Galocatechin             | 307 | 291 | 81  | 20 |
| Galocatechin             | 307 | 139 | 81  | 20 |
| GC 3-gallate             | 459 | 307 | 104 | 29 |
| GC 3-gallate             | 459 | 289 | 104 | 29 |
| Gallic acid              | 171 | 127 | 59  | 20 |
| Gallic acid              | 171 | 109 | 59  | 20 |
| Syringaldehyde           | 183 | 123 | 41  | 17 |
| Syringaldehyde           | 183 | 77  | 41  | 17 |
| Syringic acid            | 199 | 140 | 16  | 21 |
| Syringic acid            | 199 | 155 | 16  | 21 |
| 6-Malonyldaidzin         | 503 | 485 | 104 | 29 |
| 6-Malonyldaidzin         | 503 | 467 | 104 | 29 |
| Daidzein                 | 255 | 237 | 102 | 28 |
| Daidzein                 | 255 | 227 | 102 | 28 |
| Eriodictyol              | 289 | 247 | 88  | 22 |
| Eriodictyol              | 289 | 271 | 88  | 22 |
| Quercetin                | 303 | 285 | 30  | 32 |
| Quercetin                | 303 | 276 | 30  | 32 |
| Quercetin                | 303 | 258 | 30  | 32 |
| Chlorogenic acid         | 355 | 163 | 50  | 15 |
| Chlorogenic acid         | 355 | 145 | 50  | 15 |
| Quercetin-3-O-rhamnoside | 449 | 303 | 104 | 29 |
| Quercetin-3-O-rhamnoside | 449 | 285 | 104 | 29 |
| Valoneic acid dilactone  | 471 | 453 | 104 | 29 |
| Valoneic acid dilactone  | 471 | 425 | 104 | 29 |
| Phloretin                | 275 | 169 | 20  | 25 |
| Phloretin                | 275 | 125 | 20  | 25 |
| Phloridzin               | 437 | 275 | 97  | 15 |
| Phloridzin               | 437 | 169 | 97  | 15 |
| Myricetin                | 320 | 153 | 80  | 35 |
| Myricetin                | 320 | 181 | 80  | 35 |
| Myricitrin               | 465 | 465 | 97  | 25 |
| Myricitrin               | 465 | 318 | 97  | 25 |
| Kaempferol               | 287 | 153 | 120 | 28 |

|                      |      |     |     |    |
|----------------------|------|-----|-----|----|
| Kaempferol           | 287  | 219 | 120 | 28 |
| Sinensetin           | 373  | 343 | 80  | 10 |
| Sinensetin           | 373  | 321 | 80  | 10 |
| Rutin                | 611  | 303 | 104 | 30 |
| Rutin                | 611  | 272 | 104 | 30 |
| Procyanidin C        | 867  | 579 | 105 | 50 |
| Procyanidin C        | 867  | 291 | 105 | 50 |
| Procyanidin tetramer | 1155 | 867 | 105 | 50 |
| Procyanidin tetramer | 1155 | 579 | 105 | 50 |

---
